# Supplementary material
Source: publisher site journal article supplement (https://www.dovepress.com/article/380627)
Supplement: Supplementary file 1 [file get_supplementary_file.php]

**Supplementary table 1. List of central independent ethics committees or institutional review boards used by all investigators except those who were required to use their local IRB.**

---

| <b>Name of ethics committee or institutional review boards</b>    |
|-------------------------------------------------------------------|
| National Agency for Medicines and Medical Devices, Romania        |
| Comisia Națională de Bioetică a Medicamentului, Romania           |
| Bioethics Committee at the Okręgowa Izba Lekarska in Łódź, Poland |
| Ethical Council at the MoH of RF, Russia                          |
| State Expert Center of the Ministry of Health of Ukraine, Ukraine |

---

**Supplementary table 2. List of ethics committees or institutional review boards used by the investigators indicated**

---

| <b>Name of ethics committee or institutional review boards</b> |
|----------------------------------------------------------------|
| Aichi Medical Association IRB, Japan                           |
| Jintokukai Sakayori Clinic IRB, Japan                          |
| Jisenkai Nanko Psychiatric Institute IRB Japan                 |
| Yoyogi Mental Clinic IRB, Japan                                |
| Dr.Mano Medical Clinic IRB, Japan                              |
| Sankeikai Nishigahara Hospital IRB, Japan                      |
| Asai Dermatology Clinic IRB, Japan                             |
| NHO Hizen Psychiatric Center IRB, Japan                        |
| Osaka Medical Association IRB, Japan                           |
| Asakayama General Hospital IRB                                 |
| Fujita Health University Hospital IRB, Japan                   |
| Ekihigashi Hifuka Clinic IRB, Japan                            |

---

---

Zenshukai Hospital IRB, Japan

Hakuseikai Aoki Hospital IRB, Japan

Shiosakikai Ino Hospital IRB, Japan

Sakurazaka Circulatory Clinic IRB, Japan

National Center of Neurology and Psychiatry IRB, Japan

Aichi Medical University Hospital IRB, Japan

LEC of SPB SHI "Psychiatric Hospital #1 n.a. P.P.Kaschenko", Russia

LEC at SPB SR Psychoneurological Inst. n.a.V.M.Bekhterev of MoH, Russia

LIEC at SBHI "Chelyabinsk Region Clinical Hospital", Russia

LEC at Msc Scientific Research Inst. of Psychiatry, Russia

EC at "Saratov Regional Psychiatry Hospital of St. Sofia", Russia

EC of the SBHI "Sverdlovsk Regional Clinical Psychiatric Hospital", Russia

LEC at SHI "Psychiatric hospital #1 n. a. N.A. Alexeev", Russia

LEC at JSC "Scientific Centre of Personalized Medicine", Russia

EC of BHIOR "Clinical Psychiatric Hospital n.a. N.N. Solodnikov", Russia

LEC Kyiv City Psychoneurological Hospital #2, Ukraine

LEC CI Cherkasy Reg.Psych.Hospital, Ukraine

LEC Kharkiv Reg.Clin.Psych.Hosp.#3, Ukraine

LEC State Institution Institute of Neurology, Psychiatry and Narcology of NAMSU, Ukraine

LEC Regional Psychoneurological Hospital #3, Ukraine

LEC CI Kherson Regional Psychiatric Hospital, Ukraine

LEC Regional Psychoneurological Hospital #1, Ukraine

LEC CI " Lviv Regional Clinical Psychiatric Hospital", Ukraine

LEC Communal Institution of Kyiv Regional Council: Regional Psychiatric-Narcolo, Ukraine

LEC TMA Psychiatry in Kyiv, Ukraine

LEC CI Odesa Regional Psychiatric Hospital №2, Ukraine

LEC Transcarpathian Regional Narcological Dispensary, Ukraine

---

**Supplementary table 3. Adverse events by treatment period at the initial dose increase from 40 to 80mg/d in max dose 80mg group (safety population)**

| Adverse events [n (%)]                   | Max dose<br>80mg group<br>(N=166) | Number of days after initial dose increase<br>from 40 to 80mg/d |         |          |           |           |
|------------------------------------------|-----------------------------------|-----------------------------------------------------------------|---------|----------|-----------|-----------|
|                                          |                                   | 1-7                                                             | 8-14    | 15-21    | 22-28     | ≥ 29      |
| <b>Any adverse events</b>                | 82 (49.4)                         | 31 (18.7)                                                       | 9 (5.9) | 12 (8.2) | 15 (10.8) | 15 (11.6) |
| <b>Common adverse events<sup>a</sup></b> |                                   |                                                                 |         |          |           |           |
| <b>Constipation</b>                      | 9 (5.4)                           | 2 (1.2)                                                         | 1 (0.7) | 1 (0.7)  | 0 (0)     | 5 (3.9)   |
| <b>Nasopharyngitis</b>                   | 9 (5.4)                           | 0 (0)                                                           | 1 (0.7) | 1 (0.7)  | 2 (1.4)   | 5 (3.9)   |
| <b>Akathisia</b>                         | 8 (4.8)                           | 3 (1.8)                                                         | 2 (1.3) | 1 (0.7)  | 1 (0.7)   | 1 (0.8)   |
| <b>Headache</b>                          | 7 (4.2)                           | 3 (1.8)                                                         | 2 (1.3) | 0 (0)    | 0 (0)     | 2 (1.6)   |
| <b>Anxiety</b>                           | 6 (3.6)                           | 2 (1.2)                                                         | 2 (1.3) | 1 (0.7)  | 0 (0)     | 1 (0.8)   |
| <b>Blood prolactin increased</b>         | 6 (3.6)                           | 0 (0)                                                           | 0 (0)   | 3 (2.1)  | 2 (1.4)   | 1 (0.8)   |
| <b>Insomnia</b>                          | 5 (3.0)                           | 2 (1.2)                                                         | 1 (0.7) | 0 (0)    | 0 (0)     | 2 (1.6)   |
| <b>Nausea</b>                            | 4 (2.4)                           | 2 (1.2)                                                         | 0 (0)   | 1 (0.7)  | 0 (0)     | 1 (0.8)   |
| <b>Parkinsonism</b>                      | 4 (2.4)                           | 0 (0)                                                           | 1 (0.7) | 1 (0.7)  | 0 (0)     | 2 (1.6)   |

<sup>a</sup> ≥ 2.0% in max dose 80mg group
